# Supplementary material for: Identification and Characterization of Major Bile Acid 7α-Dehydroxylating Bacteria in the Human Gut
Source: PubMed Central journal article supplement (PMC9426597; doi:10.1128/msystems.00455-22), 2022-06-23

FIG S1

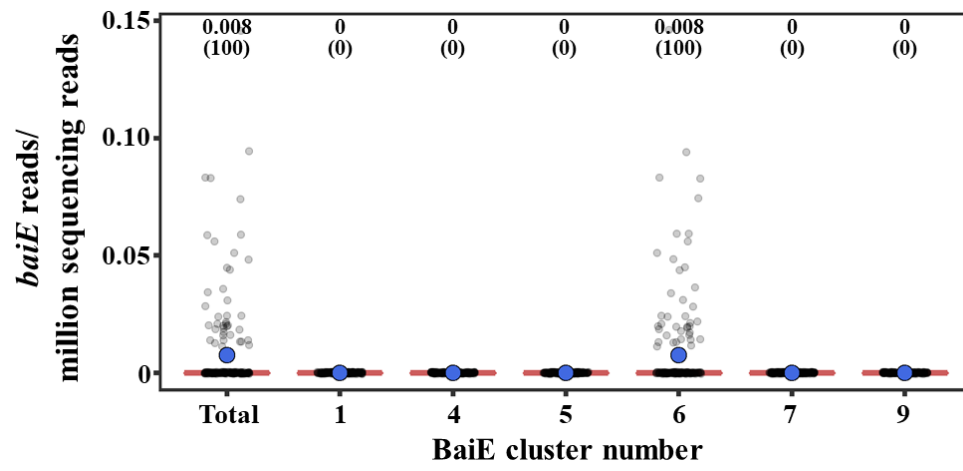

Supplement: msystems.00455-22-s0001.pdf [file msystems.00455-22-s0001.pdf]
