# Supplementary material for: Identification and Characterization of Major Bile Acid 7α-Dehydroxylating Bacteria in the Human Gut
Source: PubMed Central journal article supplement (PMC9426597; doi:10.1128/msystems.00455-22), 2022-06-23
Supplement: msystems.00455-22-s0003.pdf [file msystems.00455-22-s0003.pdf]

**TABLE S1**

| UniProt acc. no. | Organism                               | Reference |
|------------------|----------------------------------------|-----------|
| P19412           | <i>Clostridium scindens</i> VPI 12708  | 1         |
| B0NI18           | <i>Clostridium scindens</i> ATCC 35704 | 2         |
| B4YSU1           | <i>Clostridium hylemonae</i> DSM 15053 | 3         |
| Q9RB47           | <i>Clostridium hiranonis</i> DSM 13275 | 4         |

**References**

1. Dawson JA, Mallonee DH, Björkhem I, Hylemon PB. 1996. Expression and characterization of a C<sub>24</sub> bile acid 7 $\alpha$ -dehydratase from *Eubacterium* sp. strain VPI 12708 in *Escherichia coli*. *J Lipid Res* 37:1258–1267.
2. Bhowmik S, Chiu HP, Jones DH, Chiu HJ, Miller MD, Xu Q, Farr CL, Ridlon JM, Wells JE, Elsliger MA. 2016. Structure and functional characterization of a bile acid 7 $\alpha$  dehydratase BaiE in secondary bile acid synthesis. *Proteins* 84:316–331.
3. Ridlon JM, Kang DJ, Hylemon PB. 2010. Isolation and characterization of a bile acid inducible 7 $\alpha$ -dehydroxylating operon in *Clostridium hylemonae* TN271. *Anaerobe* 16:137–146.
4. Wells JE, Hylemon PB. 2000. Identification and characterization of a bile acid 7 $\alpha$ -dehydroxylation operon in *Clostridium* sp. strain TO-931, a highly active 7 $\alpha$ -dehydroxylating strain isolated from human feces. *Appl Environ Microbiol* 66: 1107–1113.
