# Supplementary material for: Identification and Characterization of Major Bile Acid 7α-Dehydroxylating Bacteria in the Human Gut
Source: PubMed Central journal article supplement (PMC9426597; doi:10.1128/msystems.00455-22), 2022-06-23
Supplement: msystems.00455-22-s0004.pdf [file msystems.00455-22-s0004.pdf]

**TABLE S2**

| UniProt acc. no. | Functional description           | Taxonomic description*                                  |
|------------------|----------------------------------|---------------------------------------------------------|
| F7KMI9           | Bile acid 7 $\alpha$ dehydratase | <sup>U</sup> <i>Lachnospiraceae</i> bacterium 5_1_57FAA |
| A0A1C5W919       |                                  | <sup>U</sup> <i>Ruminococcus</i> sp.                    |
| A0A0K9NDZ1       |                                  | <i>Dorea</i> sp. D27                                    |
| A0A3D1VEZ9       | Nuclear transport factor 2       | <sup>U</sup> <i>Clostridiales</i> bacterium UBA11811    |
| A0A3R5Y295       | family protein                   | <i>Clostridium</i> sp. AF15-17LB                        |
| A0A395YCM0       |                                  | <i>Dorea</i> sp. AM58-8                                 |
| UPI000E527D25    |                                  | <i>Peptoclostridium</i> sp. AF21-18                     |
| UPI000471FD15    |                                  | <sup>U</sup> <i>Clostridiales</i> bacterium VE202-26    |
| UPI0008379CD3    |                                  | <i>Clostridium</i> sp. Marseille-P2538                  |
| UPI00048D1F9B    |                                  | <i>Proteocatella sphenisci</i> DSM 23131                |
| R5AU51           | Uncharacterized protein          | <sup>U</sup> <i>Firmicutes</i> bacterium CAG:103        |

\* <sup>U</sup>, uncultured
