# Supplementary material for: Identification and Characterization of Major Bile Acid 7α-Dehydroxylating Bacteria in the Human Gut
Source: PubMed Central journal article supplement (PMC9426597; doi:10.1128/msystems.00455-22), 2022-06-23
Supplement: msystems.00455-22-s0005.pdf [file msystems.00455-22-s0005.pdf]

**TABLE S3**

---

SRS075078, SRS063985, SRS056519, SRS015578, SRS142890, SRS049896, SRS045528, SRS019161, SRS018427, SRS015133, SRS017521, SRS045713, SRS147652, SRS022071, SRS050752, SRS017307, SRS101433, SRS013951, SRS015782, SRS020328, SRS050925, SRS012273, SRS098717, SRS018351, SRS024435, SRS048870, SRS065504, SRS015264, SRS014979, SRS043411, SRS021484, SRS022524, SRS078176, SRS042628, SRS019030, SRS064276, SRS049995, SRS014613, SRS015065, SRS019601, SRS014235, SRS015960, SRS011302, SRS014923, SRS078419, SRS140492, SRS013098, SRS064276, SRS015578, SRS142890, SRS014923, SRS101433, SRS147652, SRS042628, SRS045713, SRS014613, SRS078419, SRS021484, SRS017307, SRS065504, SRS012273, SRS016954, SRS056519, SRS063985, SRS022524, SRS075078, SRS047014, SRS015960, SRS140492, SRS011302, SRS014979, SRS019601, SRS015133, SRS098717, SRS014235, SRS022071, SRS045528, SRS050752, SRS050925, SRS019685, SRS013951, SRS019161, SRS014235, SRS142503, SRS024435, SRS103987, SRS013687, SRS143598, SRS015663, SRS011529

---
