# Supplementary material for: Identification and Characterization of Major Bile Acid 7α-Dehydroxylating Bacteria in the Human Gut
Source: PubMed Central journal article supplement (PMC9426597; doi:10.1128/msystems.00455-22), 2022-06-23
Supplement: msystems.00455-22-s0007.pdf [file msystems.00455-22-s0007.pdf]

**TABLE S5**

| GenBank Bioproject no. | Mouse strain | No. of samples | Reference |
|------------------------|--------------|----------------|-----------|
| PRJEB7759              | 129S         | 8              | 1         |
|                        | BALB/c       | 8              |           |
|                        | C57/BL6      | 100            |           |
|                        | NOD          | 8              |           |
|                        | SJL          | 8              |           |
|                        | SJL-C57BL/6  | 8              |           |
|                        | SV129        | 34             |           |
|                        | Swiss web    | 10             |           |

**Reference**

1. Xiao L, Feng Q, Liang S, Sonne SB, Xia Z, Qiu X, Li X, Long H, Zhang J, Zhang D. 2015. A catalog of the mouse gut metagenome. *Nat Biotechnol* 33:1103–1108.
